# Supplementary material for: Individual and Sibling Characteristics: Parental Differential Treatment and Adolescent Externalizing Behaviors
Source: Springer Nature journal article supplement (doi:10.1007/s10964-018-0892-8), 2018-07-10
Supplement: MOESM1 [file 15943798]

Table S1. Regression results for younger siblings’ Wave 2 externalizing behaviors without twins.

|  | Maternal Differential Treatment  (N = 456) | | |  | Paternal Differential Treatment  (N = 456) | | |
| --- | --- | --- | --- | --- | --- | --- | --- |
|  | β |  | (SE) |  | β |  | (SE) |
| Sibling Age Difference | -0.063 |  | (0.173) |  | -0.078 |  | (0.186) |
| Youth Self-Esteem | -0.152 |  | (0.083) |  | -0.151 |  | (0.082) |
| PDT | 0.158 |  | (0.176) |  | 0.176 |  | (0.122) |
| Age Diff. x PDT | -0.000 |  | (0.139) |  | -0.133 |  | (0.089) |
| Age Diff. x Self-Esteem | 0.150 | * | (0.070) |  | 0.170 | * | (0.070) |
| PDT x Self-Esteem | -0.006 |  | (0.070) |  | 0.016 |  | (0.064) |
| Age Diff. x PDT x Self-Esteem | -0.083 |  | (0.063) |  | -0.118 | * | (0.047) |
| **Covariates** |  |  |  |  |  |  |  |
| Age | -0.210 |  | (0.116) |  | -0.209 | + | (0.108) |
| Gender | -0.519 |  | (0.350) |  | -0.429 |  | (0.325) |
| Sibling Type | -0.014 |  | (0.256) |  | -0.022 |  | (0.260) |
| Internalizing (W1) | 0.001 |  | (0.086) |  | 0.005 |  | (0.080) |
| Externalizing (W1) | 0.575 | *** | (0.094) |  | 0.581 | *** | (0.087) |
|  |  |  |  |  |  |  |  |
| R2 | 0.33 |  |  |  | 0.34 |  |  |

*Note*. Unstandardized beta-weights presented with corresponding standard errors (SE) in parentheses. W1 = Wave 1. Age Diff = age difference. PDT = parental differential treatment. x signifies interactions. Sibling type = the type of sibling relationship based on genetic relatedness (full siblings, half siblings, or genetically unrelated stepsiblings). Because there was no evidence of differences across sibling relationship quality type, results from the constrained model (reflecting all sibling relationship quality types) are presented.

+ *p* <.10; * *p* < .05; ** *p* < .01; *** *p* < .001.

|  | Low Affect  (N = 449) | | |  | Primarily Negative  (N = 449) | | |  | Primarily Positive  (N = 449) | | |
| --- | --- | --- | --- | --- | --- | --- | --- | --- | --- | --- | --- |
|  | β |  | (SE) |  | β |  | (SE) |  | β |  | (SE) |
| Sibling Age Difference | 0.670 |  | (0.443) |  | 0.106 |  | (0.371) |  | 0.125 |  | (0.318) |
| Youth Self-Esteem | 0.174 |  | (0.140) |  | 0.213 | + | (0.109) |  | 0.057 |  | (0.176) |
| PDT | 0.321 |  | (0.341) |  | 0.386 |  | (0.308) |  | 0.327 |  | (0.428) |
| Age Diff. x PDT | -0.055 |  | (0.319) |  | 0.011 |  | (0.242) |  | 0.207 |  | (0.297) |
| Age Diff. x Self-Esteem | -0.129 |  | (0.133) |  | -0.184 |  | (0.108) |  | 0.132 |  | (0.126) |
| PDT x Self-Esteem | 0.039 |  | (0.111) |  | -0.093 |  | (0.082) |  | 0.020 |  | (0.163) |
| Age Diff. x PDT x Self-Esteem | 0.087 |  | (0.109) |  | 0.181 | * | (0.073) |  | 0.106 |  | (0.123) |
| **Covariates** |  |  |  |  |  |  |  |  |  |  |  |
| Age | 0.052 |  | (0.169) |  | -0.109 |  | (0.223) |  | 0.196 |  | (0.185) |
| Gender | -0.348 |  | (0.566) |  | -1.542 | ** | (0.562) |  | 0.251 |  | (0.791) |
| Sibling Type | 0.547 | * | (0.258) |  | 0.349 |  | (0.376) |  | -0.325 |  | (0.327) |
| Internalizing (W1) | 0.119 |  | (0.138) |  | -0.082 |  | (0.099) |  | 0.236 |  | (0.174) |
| Externalizing (W1) | 0.267 | * | (0.129) |  | 0.187 |  | (0.118) |  | 0.333 | + | (0.181) |
|  |  |  |  |  |  |  |  |  |  |  |  |
| R2 | 0.38 |  |  |  | 0.45 |  |  |  | 0.56 |  |  |

Table S2. Regression results for older siblings’, maternal differential treatment Wave 2 externalizing behaviors.

*Note*. Unstandardized beta-weights presented with corresponding standard errors (SE) in parentheses. W1 = Wave 1. Age Diff = age difference. PDT = parental differential treatment. x signifies interactions. Sibling type = the type of sibling relationship based on genetic relatedness (full siblings, half siblings, or genetically unrelated stepsiblings). Because there was evidence of differences across sibling relationship quality type, results from the full model (reflecting all sibling relationship quality types) are presented.

+ *p* <.10; * *p* < .05; ** *p* < .01; *** *p* < .001.

|  | Low Affect  (N = 449) | | |  | Primarily Negative  (N = 449) | | |  | Primarily Positive  (N = 449) | | |
| --- | --- | --- | --- | --- | --- | --- | --- | --- | --- | --- | --- |
|  | β |  | (SE) |  | β |  | (SE) |  | β |  | (SE) |
| Sibling Age Difference | 0.496 |  | (0.433) |  | -0.402 |  | (0.458) |  | 0.123 |  | (0.340) |
| Youth Self-Esteem | 0.154 |  | (0.125) |  | 0.050 |  | (0.167) |  | 0.005 |  | (0.156) |
| PDT | 0.153 |  | (0.122) |  | -0.212 |  | (0.361) |  | 0.340 |  | (0.386) |
| Age Diff. x PDT | 0.302 |  | (0.255) |  | 0.396 |  | (0.336) |  | 0.156 |  | (0.235) |
| Age Diff. x Self-Esteem | -0.058 |  | (0.130) |  | -0.072 |  | (0.134) |  | 0.247 | * | (0.112) |
| PDT x Self-Esteem | 0.083 |  | (0.133) |  | 0.073 |  | (0.098) |  | -0.061 |  | (0.131) |
| Age Diff. x PDT x Self-Esteem | -0.099 |  | (0.142) |  | 0.037 |  | (0.095) |  | 0.235 | * | (0.116) |
| **Covariates** |  |  |  |  |  |  |  |  |  |  |  |
| Age | 0.053 |  | (0.176) |  | 0.120 |  | (0.254) |  | 0.111 |  | (0.208) |
| Gender | -0.137 |  | (0.550) |  | -1.375 | * | (0.668) |  | 0.275 |  | (0.770) |
| Sibling Type | -0.561 |  | (0.381) |  | -0.424 |  | (0.545) |  | 0.666 |  | (0.430) |
| Internalizing (W1) | 0.168 |  | (0.125) |  | -0.039 |  | (0.101) |  | 0.225 |  | (0.179) |
| Externalizing (W1) | 0.286 | * | (0.132) |  | 0.243 | * | (0.123) |  | 0.371 | + | (0.189) |
|  |  |  |  |  |  |  |  |  |  |  |  |
| R2 | .38 |  |  |  | .34 |  |  |  | .65 |  |  |

Table S3. Regression results for older siblings’, paternal differential treatment Wave 2 externalizing behaviors.

*Note*. Unstandardized beta-weights presented with corresponding standard errors (SE) in parentheses. W1 = Wave 1. Age Diff = age difference. PDT = parental differential treatment. x signifies interactions. Sibling type = the type of sibling relationship based on genetic relatedness (full siblings, half siblings, or genetically unrelated stepsiblings). Because there was evidence of differences across sibling relationship quality type, results from the full model (reflecting all sibling relationship quality types) are presented.

+ *p* <.10; * *p* < .05; ** *p* < .01; *** *p* < .001.
